# Supplementary material for: Targeted Social Mobilization in a Global Manhunt
Source: PubMed Central journal article supplement (PMC3786994; doi:10.1371/journal.pone.0074628), 2013-09-30
Supplement: pone.0074628.s001.pdf [file pone.0074628.s001.pdf]

Supporting online material for:

## Targeted Social Mobilization in a Global Manhunt

### Contents

|                   |   |
|-------------------|---|
| A Flight Network  | 1 |
| B Reduced Network | 4 |
| C Website Traffic | 5 |
| D List of Cities  | 5 |

### A Flight Network

We can visualise the adjacency matrix of the MSA network both in terms of raw number of flights (Fig (1)) and the normalised, locality and greediness-adjusted edges (Fig (2)). There are 2 striking features in Figure (1), firstly we see a strong community structure with respect to continents as also observed in [1], particularly within Asia and secondly the high occupation of the diagonal. While the intercontinent connectivity is intuitively understandable, the latter is explained by geography. In regions such as Polynesia, there are a large number of flights between small regional airports on different islands but few outside of the community. Among the MSA's which represented the largest number of airports, were Jakarta (Indonesia), Auckland (New Zealand), Anchorage (Alaska, USA) and Port Moresby (Papua New Guinea) which are all regional hubs within sparsely-populated or archipelagic areas which may only feasibly be navigated by air. Since these small regional airports all agglomerate to a single MSA, it appears that a large volume of flights appear to leave from and arrive at the same MSA. Therefore these hubs have large unadjusted localities represented by large values along the diagonal. This artifact of the agglomeration process has a negligible affect on the structure of the network as a whole since these communities are not particularly central; this can be seen by the low centralities of these MSA's

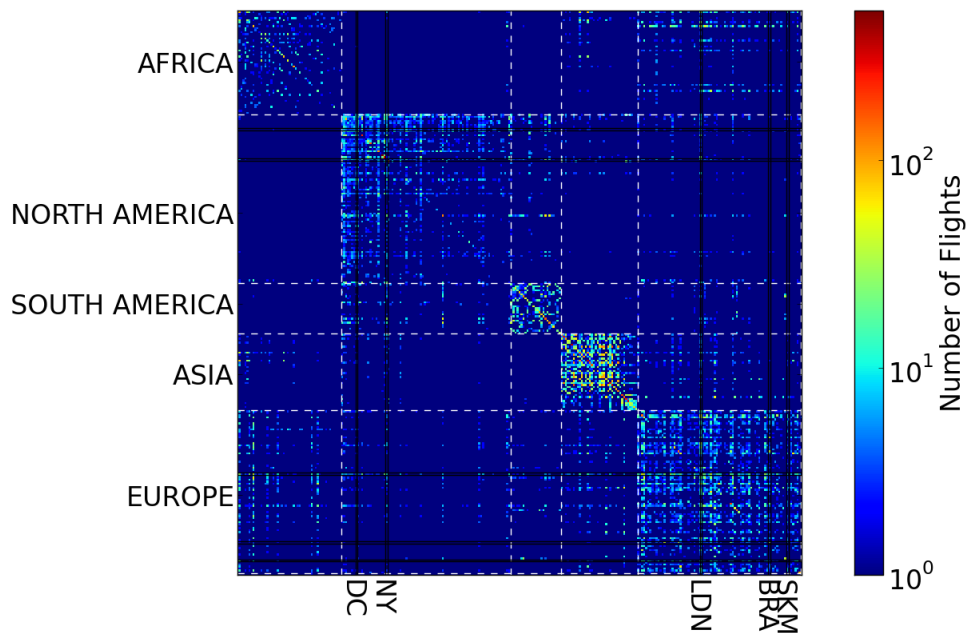

Figure 1: Heat map of raw flight numbers. Continent limits are marked by white dashed lines and tag cities with black lines.

Table 1: Table of regional hub MSA's and centralities

| MSA          | Centrality | Centrality/Centrality <sub>equal</sub> |
|--------------|------------|----------------------------------------|
| Jakarta      | 0.00572    | 1.24                                   |
| Auckland     | 0.00289    | 0.63                                   |
| Anchorage    | 0.00092    | 0.20                                   |
| Port Moresby | 0.00176    | 0.38                                   |
| Equal        | 0.0046     |                                        |

The adjusted adjacency matrix used in the simulations and shown in Figure (2) maintains the strong continental community effect, however the localities have been uniformly set to 0.39 and a greediness of 30% has been applied. In a few cases this greediness leads to increased locality if all outgoing edges from an MSA move the message away from the nearest Tag city. The greediness also leads to a number of strong connections to Europe (but not directly the the European Tag cities); the turquoise dots representing strength 0.3 in the columns on the right of the figure.

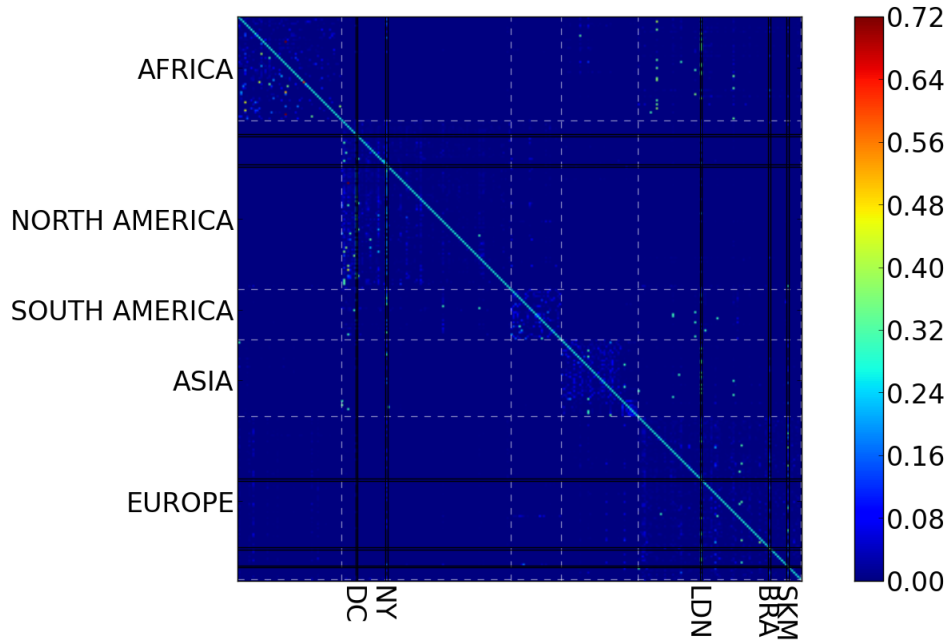

Figure 2: Heat map of normalised and locality-adjusted adjacency matrix with greediness set to 0.3. Continent limits are marked by white dashed lines and tag cities with black lines.

Table (2) shows the centralities of the most central MSAs in the network along with the Tag cities for comparison. All of the tag cities are above the baseline of equal centrality amongst all the nodes, however London, Washington DC and NY are especially so.

Table 2: Table of MSA's with highest centrality values after locality adjustment (and tag cities for comparison)

| MSA               | Centrality | Centrality/Centrality <sub>equal</sub> |
|-------------------|------------|----------------------------------------|
| Shanghai          | 0.02242    | 6.28                                   |
| London            | 0.02231    | 6.25                                   |
| Chongqing         | 0.01988    | 5.57                                   |
| Beijing           | 0.01745    | 4.89                                   |
| Barcelona         | 0.0155     | 4.34                                   |
| Milan             | 0.0149     | 4.17                                   |
| London            | 0.02225    | 6.25                                   |
| NY                | 0.010      | 2.80                                   |
| DC                | 0.00645    | 1.87                                   |
| Bratislava/Vienna | 0.0054     | 1.51                                   |
| Stockholm         | 0.0059     | 1.65                                   |
| Equal             | 0.00357    |                                        |

## B Reduced Network

Figure (3) shows the effective centralities of the cities within a reduced network comprising the cities of North America and Europe only (compare with the full global network shown in Fig (6) in the main paper). A degree of targeting of 30% now leads to a proportion of messages reaching the tag cities of 0.50 (compared to 0.44 using the full network). As expected the proportion of time spent in the tag cities increases as nodes are removed from the network. In fact the effect of the removal of the South American, African and Asian MSA's becomes smaller as targeting becomes stronger and routes the message towards the western hemisphere. Considering the pure, non-targeting random walk the reduced network increases the Tag proportion from 0.05 to 0.09; a percentage increase of 80%. However as the targeting becomes stronger this percentage difference becomes smaller. When greediness is set to 30% the reduced network increases the tag proportion from 0.44 to 0.50, an increase of only 13%.

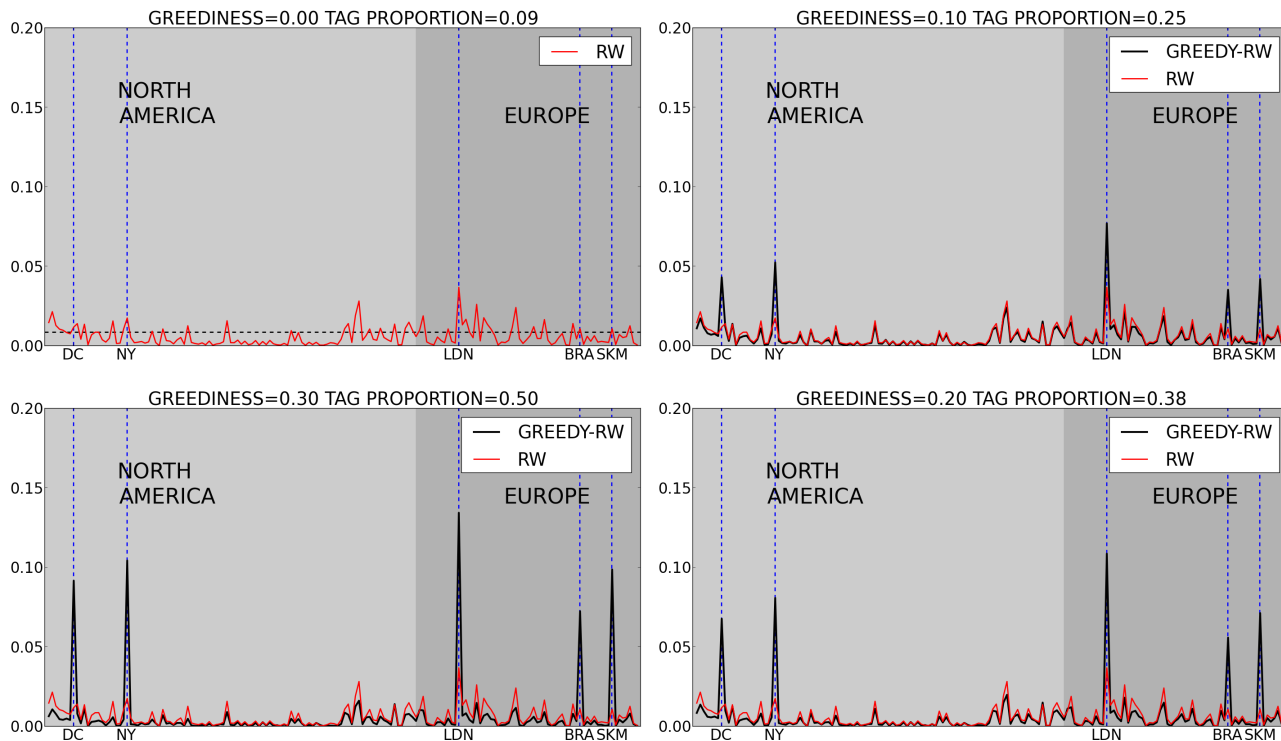

Figure 3: Plot of stationary distribution during a random walk on reduced MSA network (comprising only North America and Europe), with increasing degree of greediness moving clockwise from top left. The red line represents an unbiased random walk, corresponding to pure random mobilization via broadcast messaging. (Top left) The horizontal dashed line represents the uniform distribution of centralities expected in a fully connected graph. The black line in other plots represents a greedy random walk.

## C Website Traffic

Figure (4) shows the geographical distribution of traffic to our team’s website in the 48 hours approaching the challenge. Traffic overwhelmingly originates from Europe and North America, particularly since this snapshot is from the critical latter stages of the propagation process, but we can also notice the presence of traffic originating from South America, Australia and Asia Pacific. The fact that tag traffic is significant even outside the Anglosphere suggests that the information diffusion either took place in languages other than English (a small but significant number of tweets were in languages other than English) or the English language media exposure was accessible via the *lingua franca*. While the South American, Asian and African nodes clearly participated in the diffusion, the network upon which this took place is likely somewhere between the reduced network presented here and the full global network presented in the main paper. Regardless of which extreme of network substrate dominates, we can conclude that significant targeting is required to reproduce the proportions of traffic towards the Tag cities.

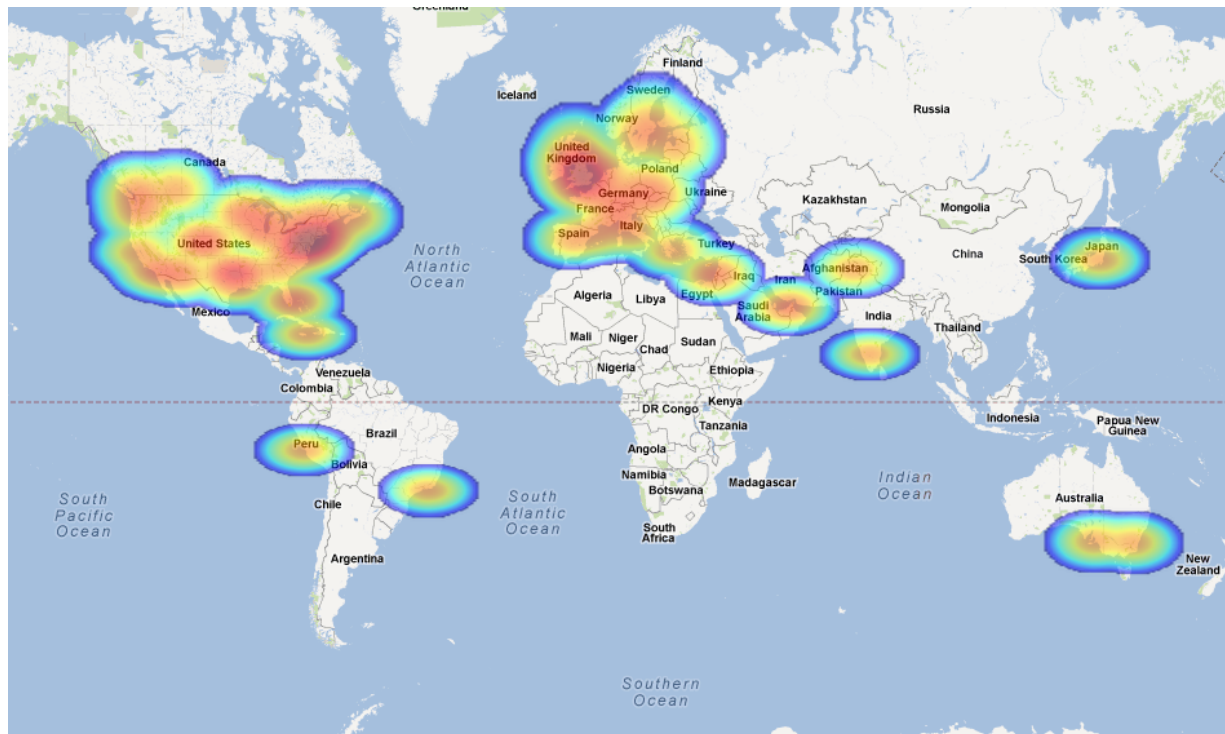

Figure 4: Heatmap showing traffic to crowds scanner.com on 48 hours approaching the challenge.

## D List of Cities

### References

- [1] Guimera R, Mossa S, Turtschi A, Amaral LAN (2005) The worldwide air transportation network: Anomalous centrality, community structure, and cities’ global roles. *Proceedings of the National Academy of Sciences* 102:7794–7799.

Table 3: List of cities in North America

|                |                  |
|----------------|------------------|
| Los Angeles    | Chicago          |
| Toronto        | Dallas           |
| Houston        | Philadelphia     |
| Detroit        | Washington       |
| Atlanta        | San Diego        |
| Boston         | Riverside        |
| Phoenix        | Seattle          |
| Minneapolis    | Tampa            |
| Saint Louis    | Baltimore        |
| Denver         | El Paso          |
| Anchorage      | Vancouver        |
| New York       | Honolulu         |
| San Antonio    | San Jose         |
| Jacksonville   | Indianapolis     |
| Austin         | San Francisco    |
| Columbus       | Fort Worth       |
| Charlotte      | Detroit          |
| El Paso        | Memphis          |
| Boston         | Nashville        |
| Denver         | Baltimore        |
| Louisville     | Milwaukee        |
| Portland       | Oklahoma City    |
| Las Vegas      | Albuquerque      |
| Tucson         | Fresno           |
| Sacramento     | Long Beach       |
| Kansas City    | Virginia Beach   |
| Corpus Christi | Colorado Springs |
| Raleigh        | Omaha            |
| Miami          | Tulsa            |
| Oakland        | Cleveland        |
| Minneapolis    | Wichita          |
| New Orleans    | Bakersfield      |
| Tampa          | Honolulu         |
| Santa Ana      | St. Louis        |
| Pittsburgh     | Lexington        |
| Cincinnati     | Anchorage        |
| Saint Paul     | Greensboro       |
| Lincoln        | Buffalo          |
| Fort Wayne     | Saint Petersburg |
| Orlando        | Norfolk          |
| Laredo         | Madison          |
| Lubbock        | Durham           |
| WinstonSalem   | Garland          |
| Baton Rouge    | Reno             |
| Scottsdale     | San Bernardino   |
| Birmingham     | Rochester        |

Table 4: List of cities in South America

| City           | Country          |
|----------------|------------------|
| Mexico City    | Mexico           |
| São Paulo      | Brazil           |
| Buenos Aires   | Argentina        |
| Rio de Janeiro | Brazil           |
| Lima           | Peru             |
| Bogotá         | Colombia         |
| Caracas        | Venezuela        |
| Santiago       | Chile            |
| Belo Horizonte | Brazil           |
| Guadalajara    | Mexico           |
| Monterrey      | Mexico           |
| Porto Alegre   | Brazil           |
| Recife         | Brazil           |
| Salvador       | Brazil           |
| Brasilia       | Brazil           |
| Medelln        | Colombia         |
| Fortaleza      | Brazil           |
| Santo Domingo  | Dominic Republic |
| Curitiba       | Brazil           |
| Guatemala City | Guatemala        |
| Cali           | Colombia         |
| Guayaquil      | Ecuador          |
| Puebla         | Mexico           |
| Campinas       | Brazil           |
| San Juan       | Puerto Rico      |

Table 5: List of cities in Europe

| City             | Country        | City           | Country        |
|------------------|----------------|----------------|----------------|
| Amsterdam        | Netherlands    | Antwerp        | Belgium        |
| Athens           | Greece         | Barcelona      | Spain          |
| Baku             | Azerbaijan     | Belgrade       | Serbia         |
| Berlin           | Germany        | Bremen         | Germany        |
| Bristol          | United Kingdom | Brussels       | Belgium        |
| Bucharest        | Romania        | Budapest       | Hungary        |
| Cardiff          | United Kingdom | Copenhagen     | Denmark        |
| Donetsk          | Ukraine        | Dnipropetrovsk | Ukraine        |
| Dublin           | Ireland        | Frankfurt      | Germany        |
| Glasgow          | United Kingdom | Hamburg        | Germany        |
| Helsinki         | Finland        | Istanbul       | Turkey         |
| Katowice         | Poland         | Kazan          | Russia         |
| Kharkiv          | Ukraine        | Kiev           | Ukraine        |
| Krakow           | Poland         | Leeds          | United Kingdom |
| Lisbon           | Portugal       | Liverpool      | United Kingdom |
| Lódź             | Poland         | London         | United Kingdom |
| Lyon             | France         | Madrid         | Spain          |
| Manchester       | United Kingdom | Marseille      | France         |
| Milan            | Italy          | Minsk          | Belarus        |
| Moscow           | Russia         | Munich         | Germany        |
| Napoli           | Italy          | Nice           | France         |
| Nizhniy Novgorod | Russia         | Nottingham     | United Kingdom |
| Nuremberg        | Germany        | Odessa         | Ukraine        |
| Oslo             | Norway         | Paris          | France         |
| Perm             | Russia         | Porto          | Portugal       |
| Portsmouth       | United Kingdom | Prague         | Czech Republic |
| Düsseldorf       | Germany        | Cologne        | Germany        |
| Riga             | Latvia         | Roma           | Italy          |
| Rostov-on-Don    | Russia         | Rotterdam      | Netherlands    |
| Dortmund         | Germany        | Saarbrücken    | Germany        |
| Saint Petersburg | Russia         | Samara         | Russia         |
| Saratov          | Russia         | Seville        | Spain          |
| Sofia            | Bulgaria       | Stockholm      | Sweden         |
| Sheffield        | United Kingdom | Stuttgart      | Germany        |
| Tbilisi          | Georgia        | Thessaloniki   | Greece         |
| Turin            | Italy          | Newcastle      | United Kingdom |
| Ufa              | Russia         | Valencia       | Spain          |
| Vienna           | Austria        | Volgograd      | Russia         |
| Warsaw           | Poland         | Birmingham     | United Kingdom |
| Yerevan          | Armenia        | Zagreb         | Croatia        |
| Zurich           | Switzerland    | Reykjavk       | Iceland        |
| Milan            | Italy          | Katowice       | Poland         |
| Lille            | France         |                |                |



Table 6: List of cities in Asia

| City         | Country     | City            | Country          |
|--------------|-------------|-----------------|------------------|
| Tokyo        | Japan       | Jakarta         | Indonesia        |
| Seoul        | South Korea | Delhi           | India            |
| Mumbai       | India       | Manila          | Philippines      |
| Shanghai     | China       | Osaka           | Japan            |
| Kolkata      | India       | Karachi         | Pakistan         |
| Guangzhou    | China       | Dhaka           | Bangladesh       |
| Shenzhen     | China       | Tehran          | Iran             |
| Beijing      | China       | Bangkok         | Thailand         |
| Chennai      | India       | Nagoya          | Japan            |
| Bangalore    | India       | Hong Kong       | Hong Kong        |
| Wuhan        | China       | Taipei          | Taiwan           |
| Lahore       | Pakistan    | Tianjin         | China            |
| Kuala Lumpur | Malaysia    | Chongqing       | China            |
| Hyderabad    | India       | Ho Chi Min City | Vietnam          |
| Shenyang     | China       | Ahmedabad       | India            |
| Brisbane     | Australia   | Samarkand       | Uzbekistan       |
| Auckland     | New Zealand | Port Moresby    | Papua New Guinea |
| Sydney       | Australia   | Melbourne       | Australia        |
| Perth        | Australia   | Adelaide        | Australia        |

Table 7: List of cities in Africa

| City           | Country                            |
|----------------|------------------------------------|
| Cairo          | Egypt                              |
| Lagos          | Nigeria                            |
| Kinshasa       | Democratic Republic of the Congo   |
| Johannesburg   | South Africa                       |
| Khartoum       | Sudan                              |
| Alexandria     | Egypt                              |
| Abidjan        | Ivory Coast                        |
| Casablanca     | Morocco                            |
| Cape Town      | South Africa                       |
| Durban         | South Africa                       |
| Accra          | Ghana                              |
| Nairobi        | Kenya                              |
| Ibadan         | Nigeria                            |
| Dar es Salaam  | Tanzania                           |
| Algiers        | Algeria                            |
| Addis Ababa    | Ethiopia                           |
| Luanda         | Angola                             |
| Dakar          | Senegal                            |
| Pretoria       | South Africa                       |
| Tripoli        | Libya                              |
| Harare         | Zimbabwe                           |
| Douala         | Cameroon                           |
| Hargeisa       | Republic of Somaliland and Somalia |
| Abuja          | Nigeria                            |
| Kampala        | Uganda                             |
| Bamako         | Mali                               |
| Maputo         | Mozambique                         |
| Antananarivo   | Madagascar                         |
| Lusaka         | Zambia                             |
| Yaounde        | Cameroon                           |
| Ouagadougou    | Burkina Faso                       |
| Conakry        | Guinea                             |
| Kumasi         | Ghana                              |
| Lubumbashi     | Democratic Republic of the Congo   |
| Mbuji          | Democratic Republic of the Congo   |
| Brazzaville    | Republic of the Congo              |
| Oran           | Algeria                            |
| Benin          | Nigeria                            |
| Port Harcourt  | Nigeria                            |
| Tunis          | Tunisia                            |
| Freetown       | Sierra Leone                       |
| Cotonou        | Benin                              |
| Vereeniging    | South Africa                       |
| Fes            | Morocco                            |
| Maiduguri      | Nigeria                            |
| Monrovia       | Liberia                            |
| Port Elizabeth | South Africa                       |
| Huambo         | Angola                             |
| Ogbomosho      | Nigeria                            |
| Zaria          | Nigeria                            |
| Ndjamena       | Chad                               |
